# Supplementary material for: Temperature-driven order–disorder structural transition in the oxygen sub-lattice and the complex superstructure of the high-temperature polymorph of CaSrZn2Ga2O7
Source: Royal Society of Chemistry journal article supplement (doi:10.1039/d2dt03145k), 2022-01-01
Supplement: d2dt03145k1.pdf [file d2dt03145k1.pdf]

**Temperature-driven order-disorder structural transition in oxygen sublattice and the complex superstructure of high temperature polymorph of  $\text{CaSrZn}_2\text{Ga}_2\text{O}_7$**

Jie Qin,<sup>a</sup> Pengfei Jiang,<sup>\*a</sup> Guangxiang Lu,<sup>a</sup> Rong Wang,<sup>b</sup> and Tao Yang<sup>\*a</sup>

<sup>a</sup> College of Chemistry and Chemical Engineering, Chongqing University, Chongqing, 401331, P. R. China

<sup>b</sup> School of Metallurgy and Materials Engineering, Chongqing University of Science & Technology, Chongqing 401331, P. R. China

\*Corresponding authors: pengfeijiang@cqu.edu.cn; taoyang@cqu.edu.cn.

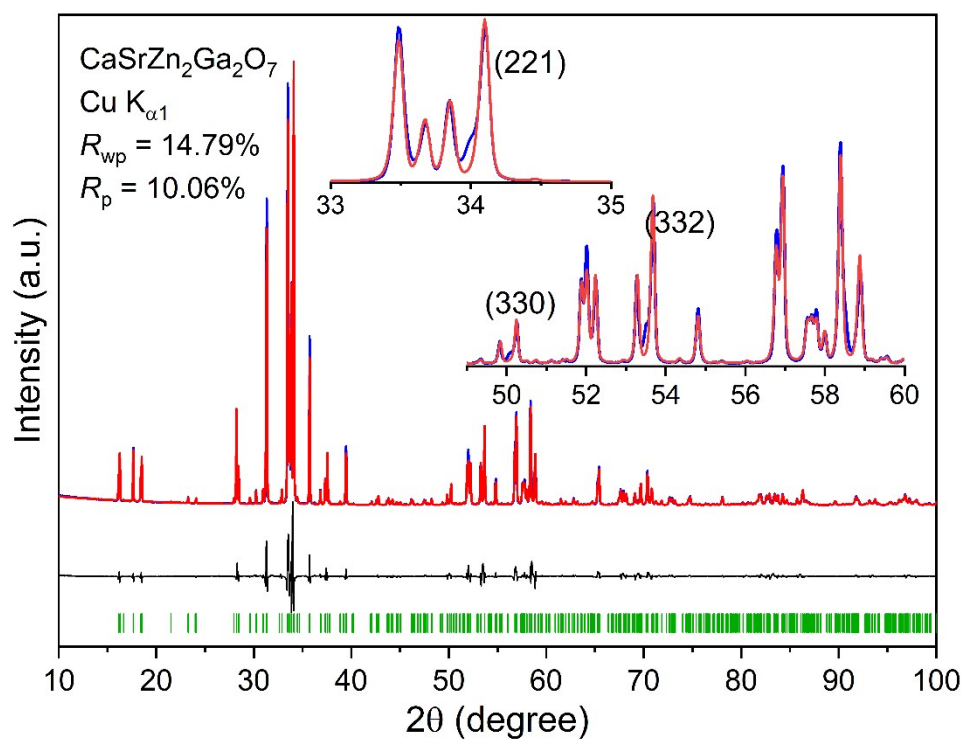

Fig. S1 Rietveld refinement plots of Cu K<sub>α1</sub> PXRD data for LT-CaSrZn<sub>2</sub>Ga<sub>2</sub>O<sub>7</sub>. The inset shows a set of peaks that could not be fitted with the *Pna2*<sub>1</sub> model.

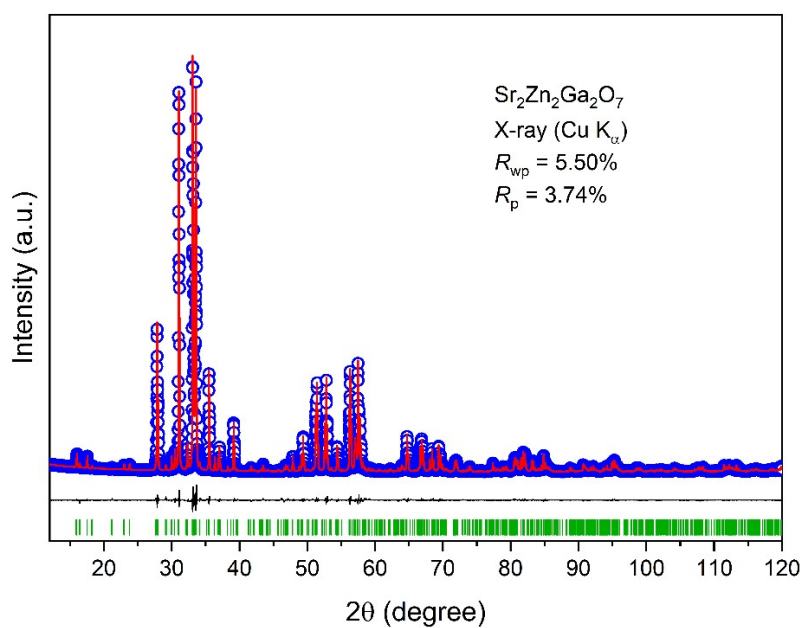

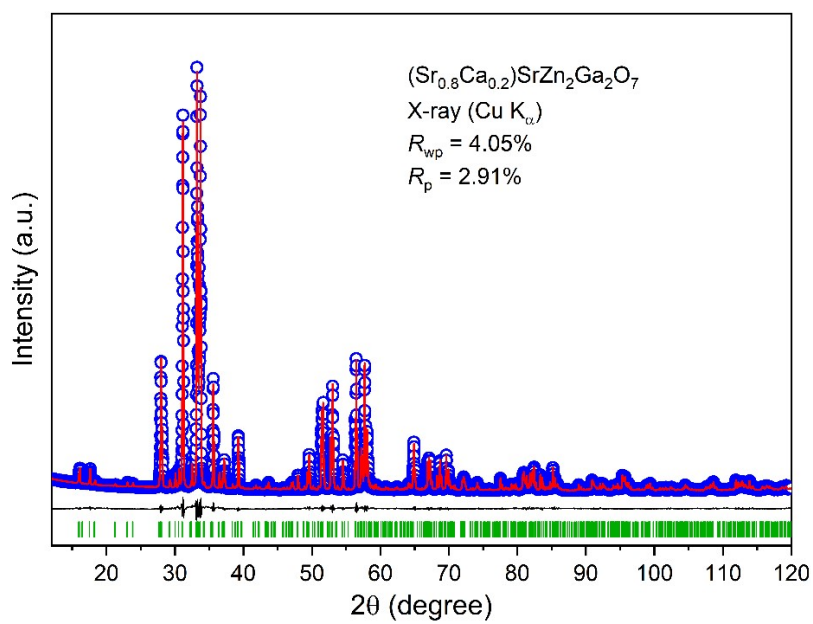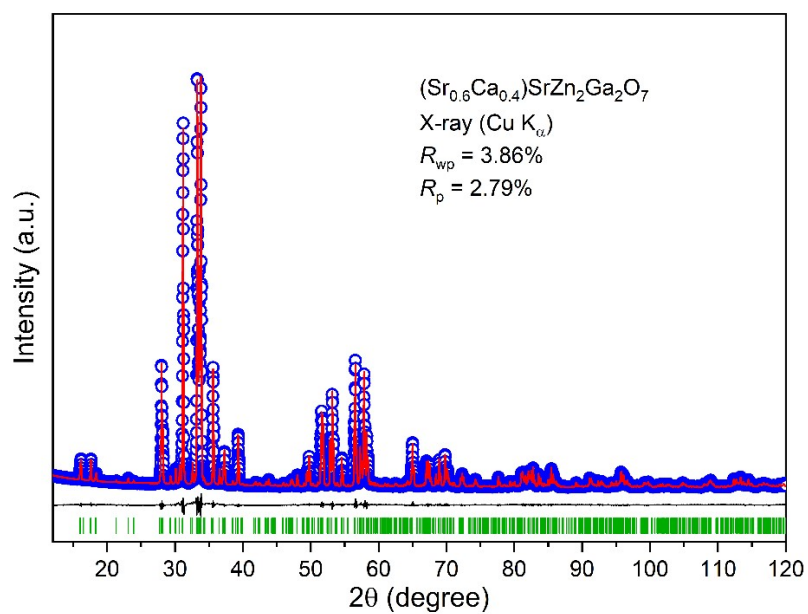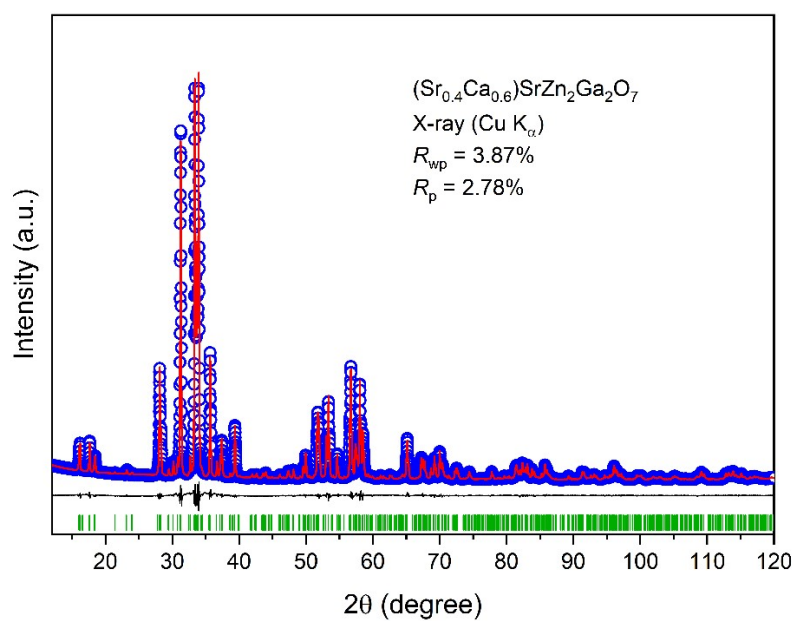

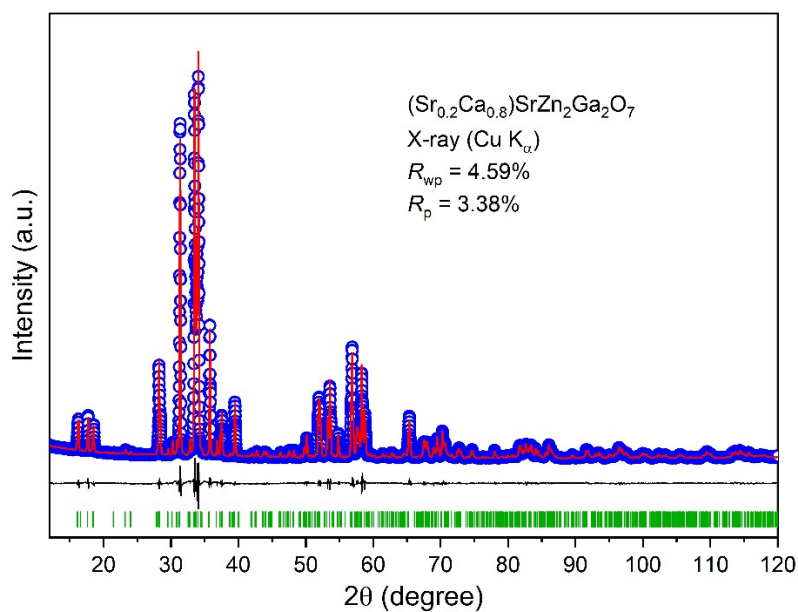

Fig. S2 Rietveld refinement patterns for orthorhombic LT- $(\text{Sr}_{1-x}\text{Ca}_x)\text{SrZn}_2\text{Ga}_2\text{O}_7$  ( $x = 0, 0.2, 0.4, 0.6,$   
and  $0.8$ ).

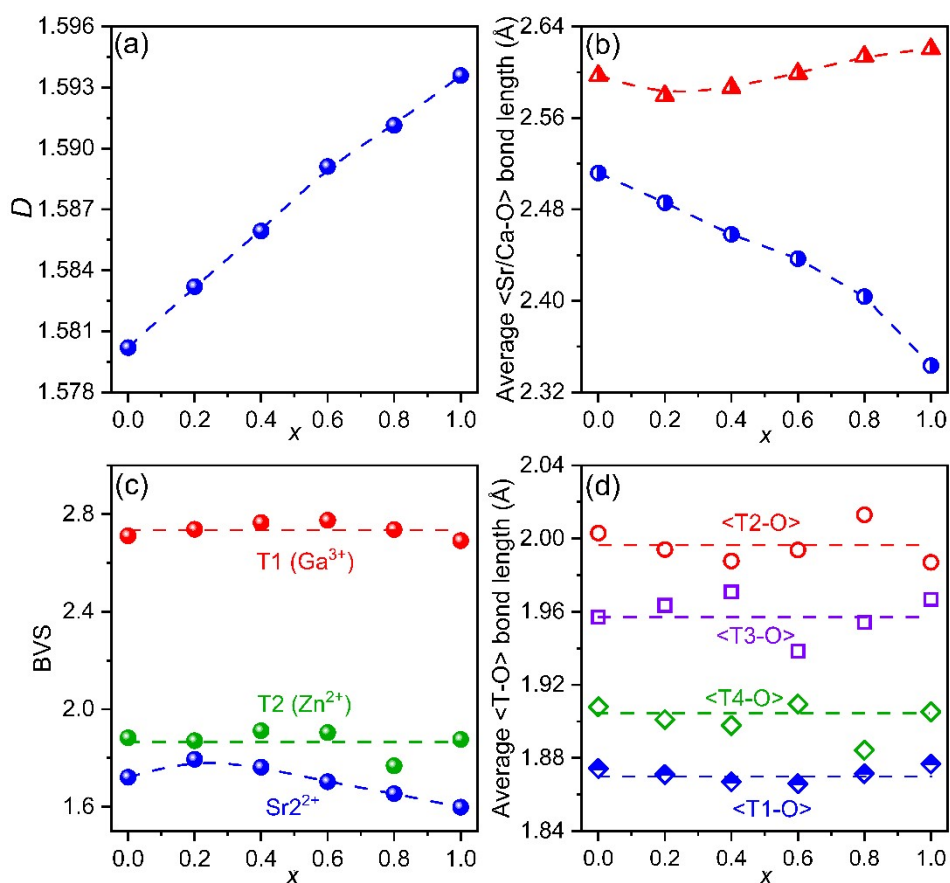

Fig. S3 Plots of distortion factor  $D$  (a), the average Sr1/Ca1-O and Sr2-O bond lengths (b), BVS values for  $\text{Ga}^{3+}$ ,  $\text{Zn}^{2+}$ , and  $\text{Sr}^{2+}$  cations, and average T-O bond lengths versus  $\text{Ca}^{2+}$ -content ( $x$ ) in

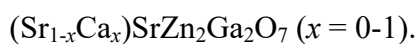

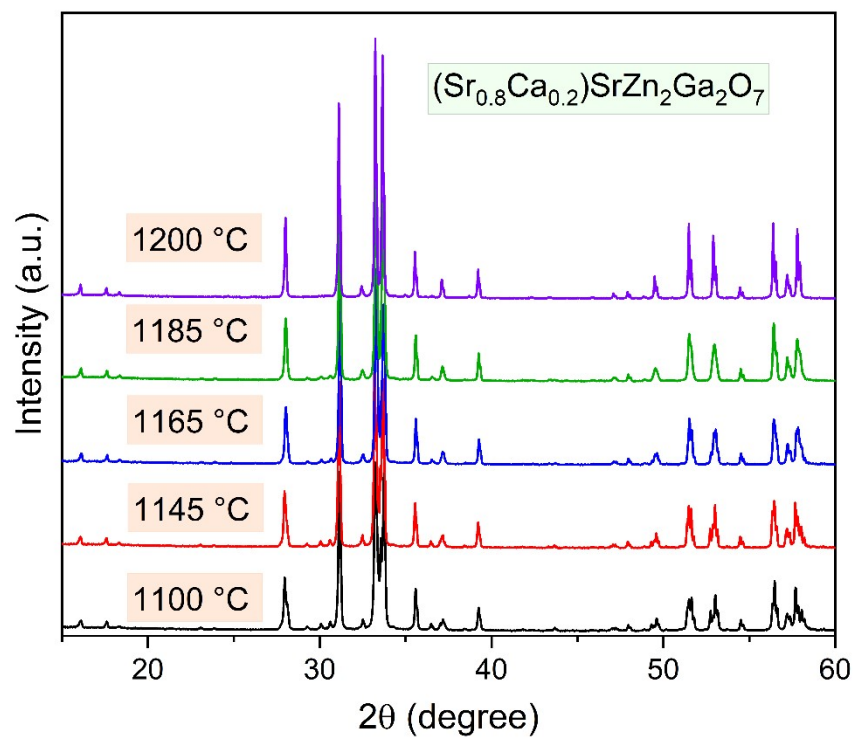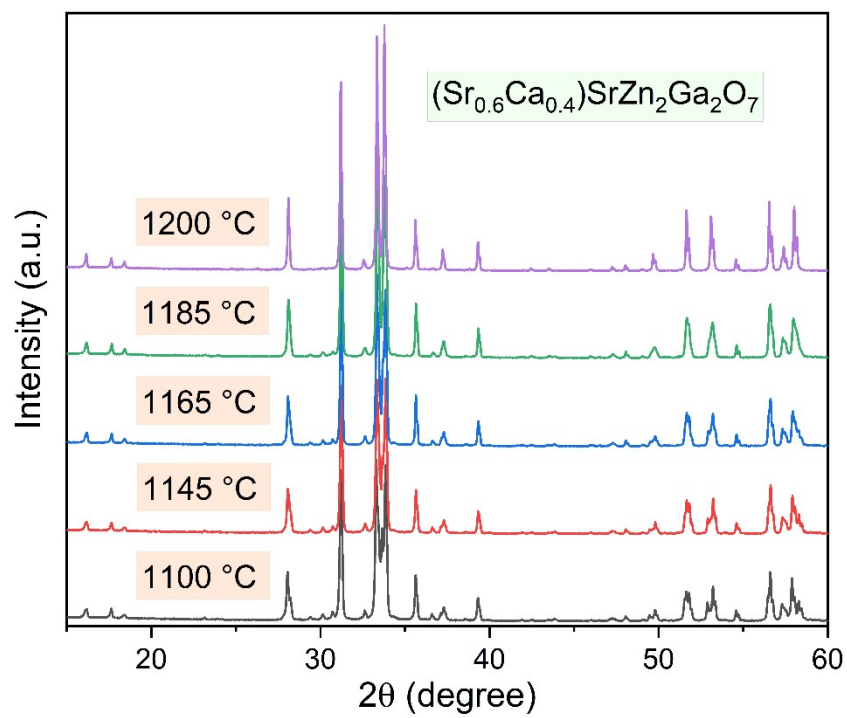

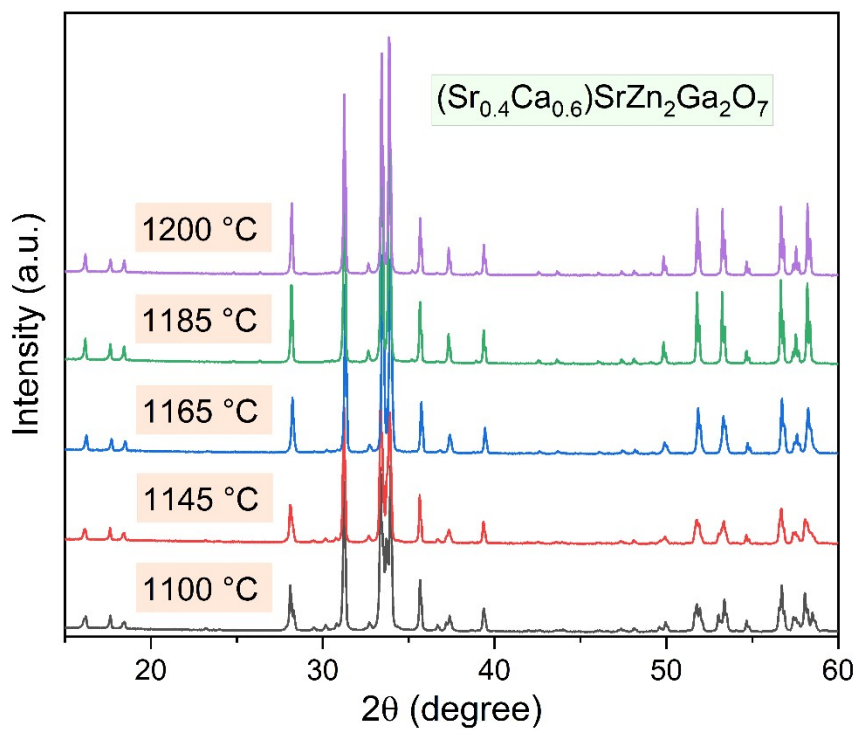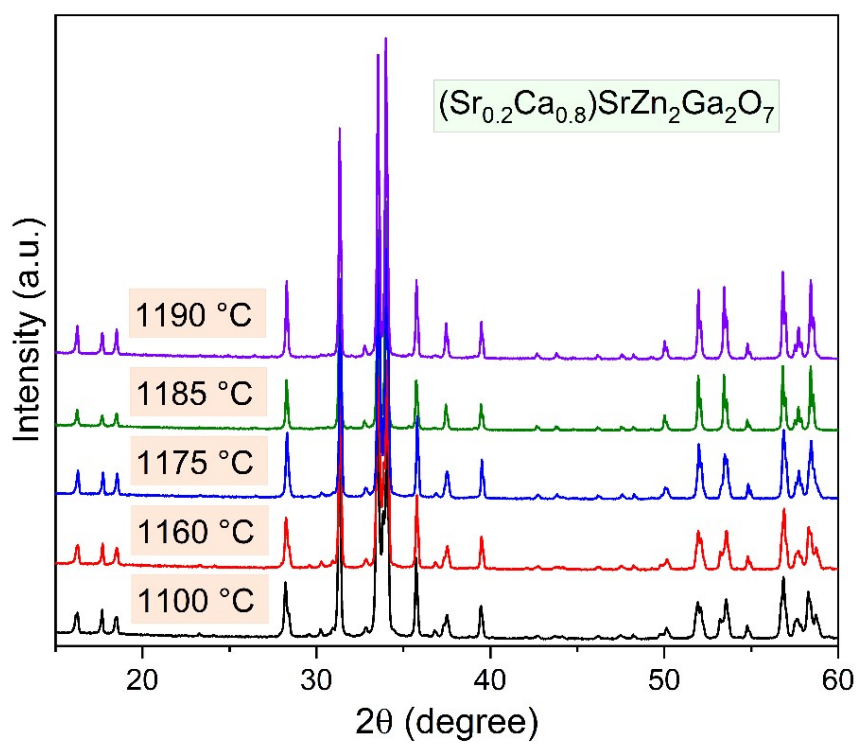

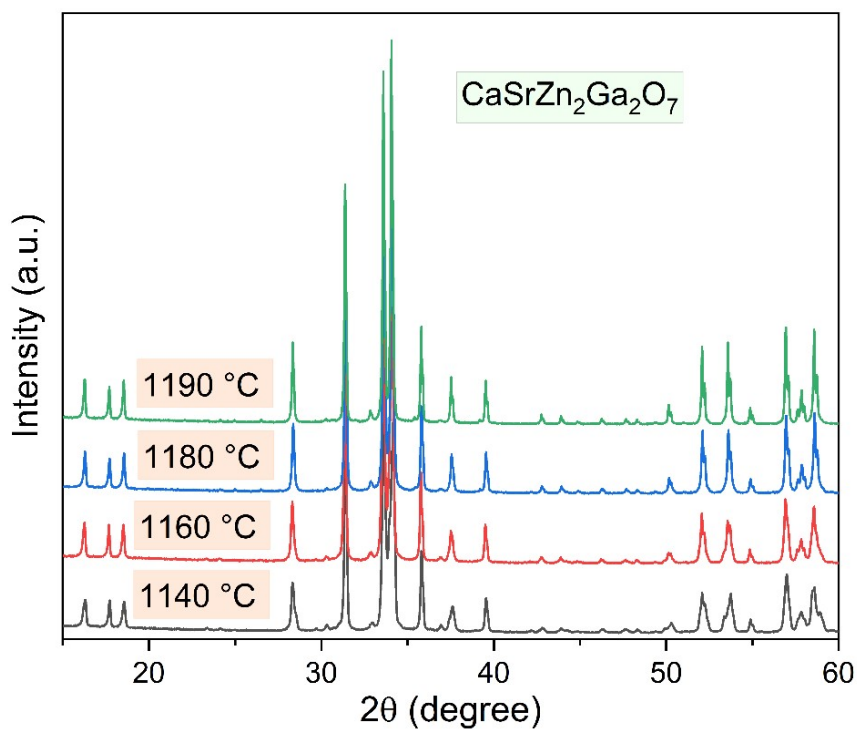

Fig. S4 The XRD patterns for  $(\text{Sr}_{1-x}\text{Ca}_x)\text{SrZn}_2\text{Ga}_2\text{O}_7$  ( $x = 0.2, 0.4, 0.6, 0.8,$  and  $1$ ) after being calcinated at different temperatures.

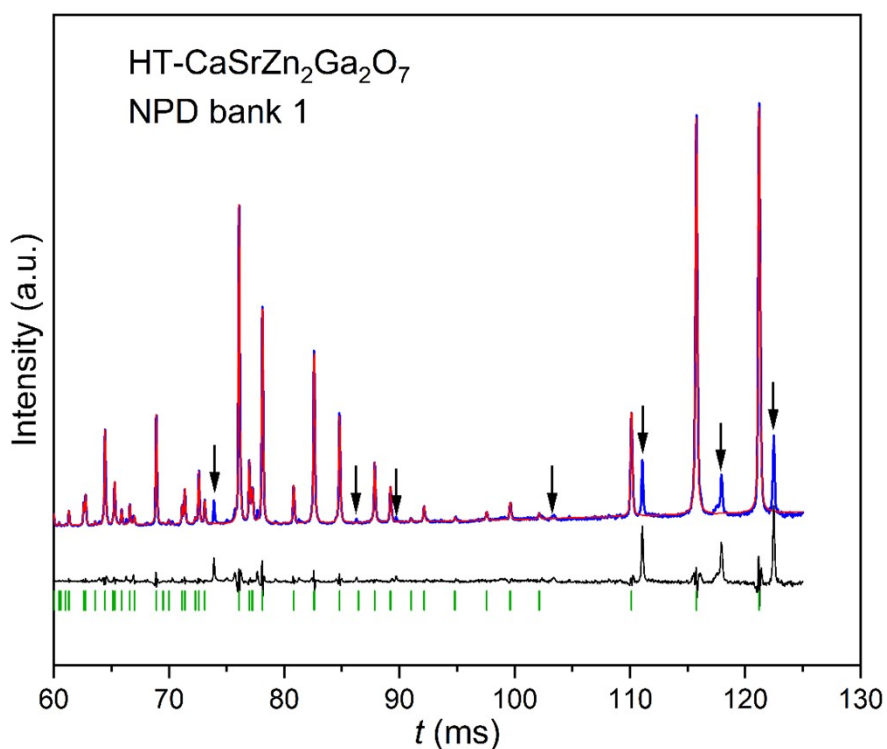

Fig. S5 Rietveld refinement plots of NPD data from bank 1 for HT  $\text{CaSrZn}_2\text{Ga}_2\text{O}_7$  using the  $P31c$  model. The black arrows represent the unindexed peaks.

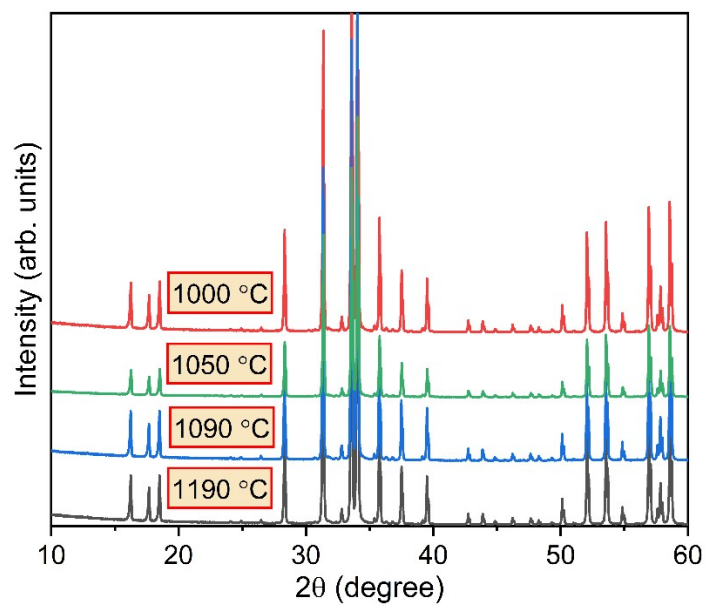

Fig. S6 PXR D patterns for  $P6_3$ - $\text{CaSrZn}_2\text{Ga}_2\text{O}_7$  after being annealed at 1090, 1050, and 1000 °C for

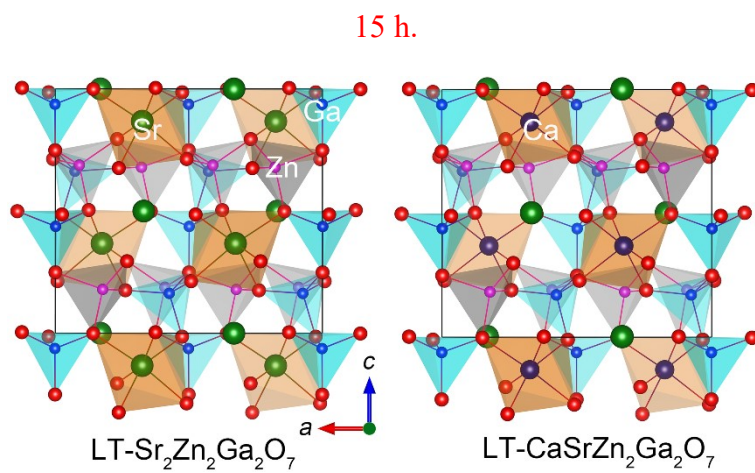

Fig. S7 Optimized LT structures for  $\text{CaSrZn}_2\text{Ga}_2\text{O}_7$  and  $\text{Sr}_2\text{Zn}_2\text{Ga}_2\text{O}_7$ .



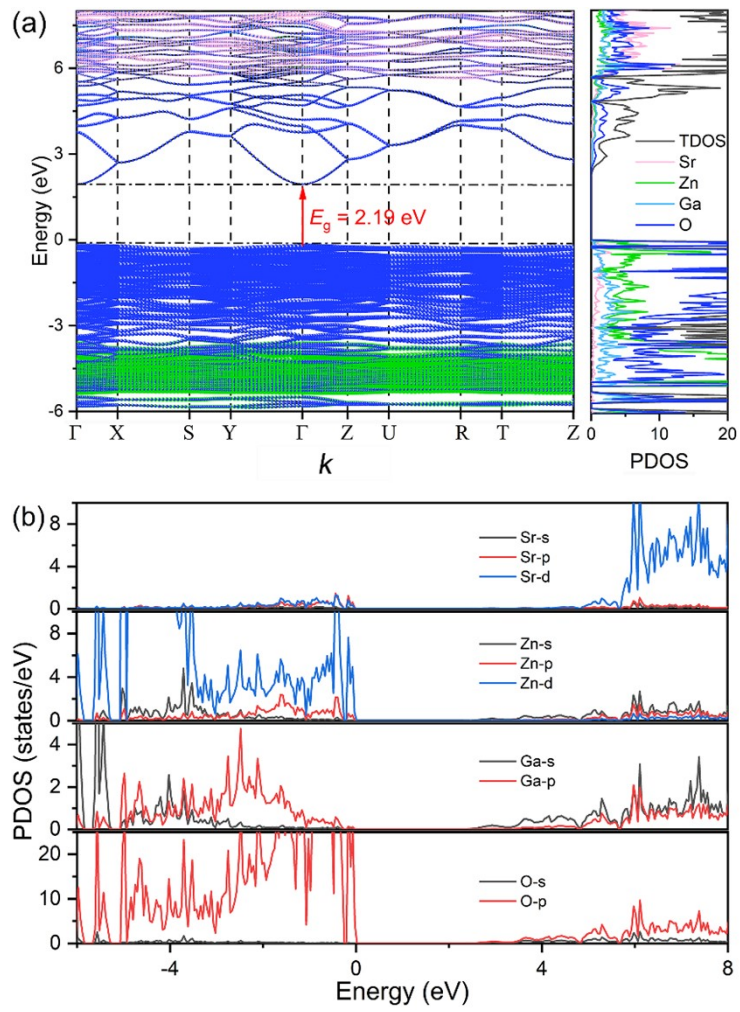

**Fig. S8** (a) The electronic band structure and total DOS of LT orthorhombic  $\text{Sr}_2\text{Zn}_2\text{Ga}_2\text{O}_7$ . (b) The partial DOS of Sr, Zn, Ga, and O.

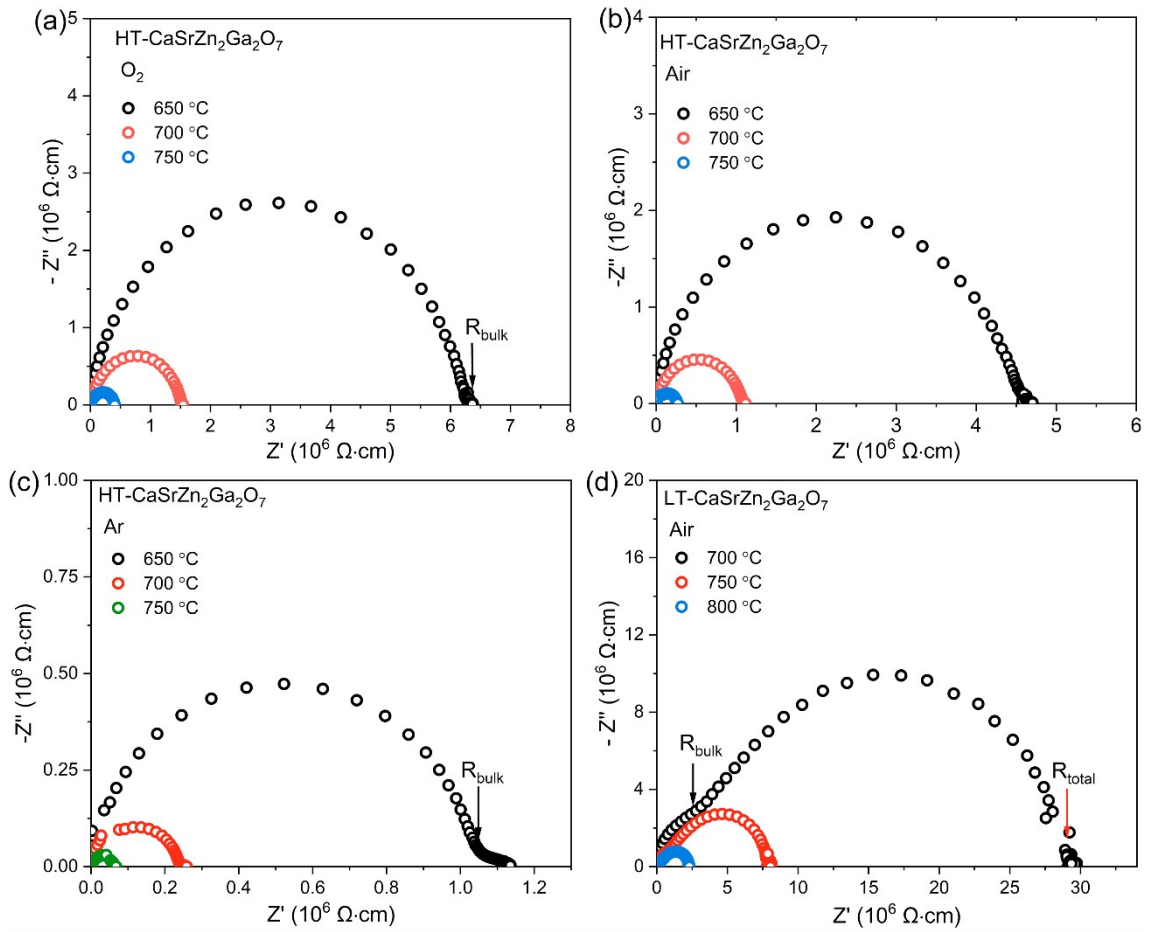

**Fig. S9** Complex impedance spectra for HT-CaSrZn<sub>2</sub>Ga<sub>2</sub>O<sub>7</sub> measured in O<sub>2</sub> (a), air (b), and Ar (c) at different temperatures. (d) Complex impedance spectra for LT-CaSrZn<sub>2</sub>Ga<sub>2</sub>O<sub>7</sub> measured in air.

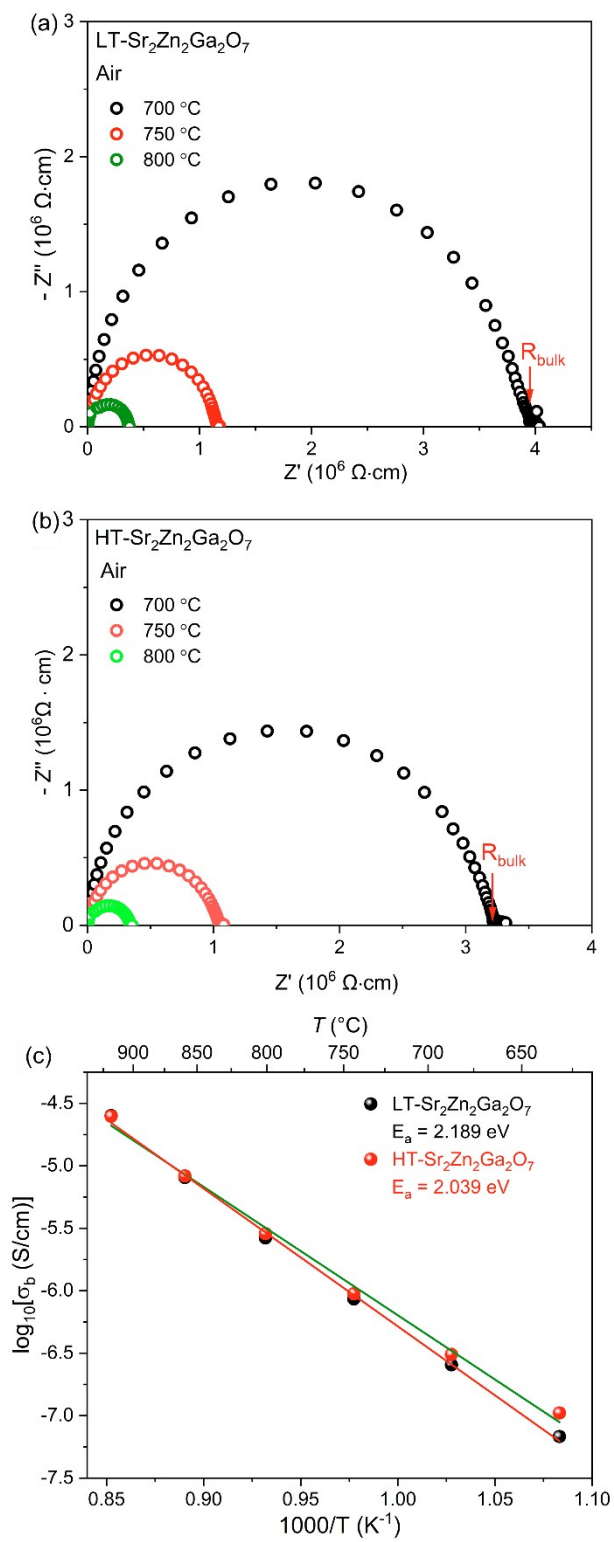

**Fig. S10** Complex impedance spectra for LT-Sr<sub>2</sub>Zn<sub>2</sub>Ga<sub>2</sub>O<sub>7</sub> (a) and HT-Sr<sub>2</sub>Zn<sub>2</sub>Ga<sub>2</sub>O<sub>7</sub> (b) measured in air. (c) Arrhenius plots of bulk conductivities for LT- and HT-Sr<sub>2</sub>Zn<sub>2</sub>Ga<sub>2</sub>O<sub>7</sub>.

Table S1. Crystallographic data for LT Sr<sub>2-x</sub>Ca<sub>x</sub>Zn<sub>2</sub>Ga<sub>2</sub>O<sub>7</sub> ( $x = 0, 0.2, 0.4, 0.6, \text{ and } 0.8$ ).

| Source                      | Laboratory X-ray                                                                                   | Laboratory X-ray                                                                                   | Laboratory X-ray                                                                                   | Laboratory X-ray                                                                                 | Laboratory X-ray                                                                                 |
|-----------------------------|----------------------------------------------------------------------------------------------------|----------------------------------------------------------------------------------------------------|----------------------------------------------------------------------------------------------------|--------------------------------------------------------------------------------------------------|--------------------------------------------------------------------------------------------------|
| Chemical formula            | Sr <sub>2</sub> Zn <sub>2</sub> Ga <sub>2</sub> O <sub>7</sub>                                     | Sr <sub>1.8</sub> Ca <sub>0.2</sub> Zn <sub>2</sub> Ga <sub>2</sub> O <sub>7</sub>                 | Sr <sub>1.6</sub> Ca <sub>0.4</sub> Zn <sub>2</sub> Ga <sub>2</sub> O <sub>7</sub>                 | Sr <sub>1.4</sub> Ca <sub>0.6</sub> Zn <sub>2</sub> Ga <sub>2</sub> O <sub>7</sub>               | Sr <sub>1.2</sub> Ca <sub>0.8</sub> Zn <sub>2</sub> Ga <sub>2</sub> O <sub>7</sub>               |
| Formula weight<br>(g/mol)   | 557.50                                                                                             | 547.99                                                                                             | 538.48                                                                                             | 528.97                                                                                           | 519.47                                                                                           |
| Temperature (K)             | 300                                                                                                | 300                                                                                                | 300                                                                                                | 300                                                                                              | 300                                                                                              |
| Wavelength (Å)              | Cu K <sub>α</sub><br>λ = 1.54060                                                                   | Cu K <sub>α</sub><br>λ = 1.54060                                                                   | Cu K <sub>α</sub><br>λ = 1.54060                                                                   | Cu K <sub>α</sub><br>λ = 1.54060                                                                 | Cu K <sub>α</sub><br>λ = 1.54060                                                                 |
| Crystal system              | Orthorhombic                                                                                       | Orthorhombic                                                                                       | Orthorhombic                                                                                       | Orthorhombic                                                                                     | Orthorhombic                                                                                     |
| Space group (No.)           | <i>Pna</i> 2 <sub>1</sub> (33)                                                                     | <i>Pna</i> 2 <sub>1</sub> (33)                                                                     | <i>Pna</i> 2 <sub>1</sub> (33)                                                                     | <i>Pna</i> 2 <sub>1</sub> (33)                                                                   | <i>Pna</i> 2 <sub>1</sub> (33)                                                                   |
| Unit cell<br>dimensions (Å) | $a = 11.12385(4)$<br>$b = 6.38024(3)$<br>$c = 10.11548(4)$<br>$\alpha = \beta = \gamma = 90^\circ$ | $a = 11.09618(5)$<br>$b = 6.35839(3)$<br>$c = 10.10473(5)$<br>$\alpha = \beta = \gamma = 90^\circ$ | $a = 11.06463(5)$<br>$b = 6.33441(3)$<br>$c = 10.08874(5)$<br>$\alpha = \beta = \gamma = 90^\circ$ | $a = 11.0321(1)$<br>$b = 6.31190(7)$<br>$c = 10.0761(1)$<br>$\alpha = \beta = \gamma = 90^\circ$ | $a = 10.9968(1)$<br>$b = 6.29129(6)$<br>$c = 10.0564(1)$<br>$\alpha = \beta = \gamma = 90^\circ$ |
| $V$ (Å <sup>3</sup> )       | 717.824(5)                                                                                         | 712.927(6)                                                                                         | 707.099(6)                                                                                         | 701.34(1)                                                                                        | 695.74(1)                                                                                        |
| $Z$                         | 4                                                                                                  | 4                                                                                                  | 4                                                                                                  | 4                                                                                                | 4                                                                                                |
| $d$ -space range (Å)        | 0.85-8.83                                                                                          | 0.85-8.83                                                                                          | 0.85-8.83                                                                                          | 0.85-8.83                                                                                        | 0.85-8.83                                                                                        |
| $\chi^2$                    | 2.67                                                                                               | 3.78                                                                                               | 3.58                                                                                               | 4.52                                                                                             | 4.18                                                                                             |
| $R_p$ (%)                   | 3.74                                                                                               | 2.91                                                                                               | 2.79                                                                                               | 2.78                                                                                             | 3.38                                                                                             |
| $R_{wp}$ (%)                | 5.50                                                                                               | 4.05                                                                                               | 3.86                                                                                               | 3.87                                                                                             | 4.59                                                                                             |
| $R_{exp}$ (%)               | 2.06                                                                                               | 1.07                                                                                               | 1.08                                                                                               | 0.855                                                                                            | 1.10                                                                                             |

Table S2. Crystallographic data for LT and HT CaSrZn<sub>2</sub>Ga<sub>2</sub>O<sub>7</sub>.

| Source                   | Laboratory X-ray                                   | Neutron                                            |
|--------------------------|----------------------------------------------------|----------------------------------------------------|
| Chemical formula         | CaSrZn <sub>2</sub> Ga <sub>2</sub> O <sub>7</sub> | CaSrZn <sub>2</sub> Ga <sub>2</sub> O <sub>7</sub> |
| Formula weight (g/mol)   | 509.96                                             | 509.96                                             |
| Temperature (K)          | 300                                                | 300                                                |
| Wavelength (Å)           | Cu K <sub>α1</sub> ( $\lambda = 1.54060$ )         | —                                                  |
| Crystal system           | Orthorhombic                                       | Hexagonal                                          |
| Space group (No.)        | <i>Pna</i> 2 <sub>1</sub> (33)                     | <i>P</i> 6 <sub>3</sub> (173)                      |
| Unit cell dimensions (Å) | $a = 10.9664(4)$                                   | $a = 10.92134(4)$                                  |
|                          | $b = 6.2664(2)$                                    | $b = 10.92134(4)$                                  |
|                          | $c = 10.0380(3)$                                   | $c = 10.04737(6)$                                  |
|                          | $\alpha = \beta = \gamma = 90^\circ$               | $\alpha = \beta = 90^\circ, \gamma = 120^\circ$    |
| $V$ (Å <sup>3</sup> )    | 689.80(4)                                          | 1034.90(1)                                         |
| $Z$                      | 4                                                  | 6                                                  |
| $d$ -space range (Å)     | 1.00-10.00                                         | 0.72-3.74                                          |
| $\chi^2$                 | 3.67                                               | 3.18                                               |
| $R_p$ (%)                | 4.89                                               | 3.22                                               |
| $R_{wp}$ (%)             | 6.66                                               | 3.80                                               |
| $R_{exp}$ (%)            | 1.81                                               | 1.19                                               |

Table S3. The Atomic Coordinates, Occupancies, Isotropic Thermal Displacement Factors for LT  $\text{Sr}_{2-x}\text{Ca}_x\text{Zn}_2\text{Ga}_2\text{O}_7$  ( $x = 0, 0.2, 0.4, 0.6, 0.8, \text{ and } 1$ ) Obtained from Rietveld Refinements against X-ray Diffraction Data.

| $x = 0$   | Site | $x$       | $y$       | $z$       | Occ.    | $B_{\text{eq.}}$ (Å) |
|-----------|------|-----------|-----------|-----------|---------|----------------------|
| Sr1       | 4a   | 0.6731(1) | 1.0002(1) | 0.8687(1) | 1       | 1.48(5)              |
| Sr2       | 4a   | 0.6659(2) | 0.0062(2) | 0.5       | 1       | 1.42(5)              |
| Ga1(T1)   | 4a   | 0.0017(3) | 0.0141(3) | 0.9377(3) | 1       | 1.02(4)              |
| Zn1(T2)   | 4a   | 0.1755(1) | 0.9802(3) | 0.6805(4) | 1       | 0.93(4)              |
| T3        | 4a   | 0.0873(2) | 0.2497(3) | 0.1902(2) | 1       | 1.11(5)              |
| T4        | 4a   | 0.9245(1) | 0.2638(3) | 0.6639(3) | 1       | 0.91(6)              |
| O1        | 4a   | 0.9971(9) | 0.978(1)  | 0.2482(7) | 1       | 0.64(6)              |
| O2        | 4a   | 0.4901(7) | 0.122(1)  | 0.2147(7) | 1       | 0.64(6)              |
| O3        | 4a   | 0.2700(7) | 0.797(1)  | 0.7909(7) | 1       | 0.64(6)              |
| O4        | 4a   | 0.7410(7) | 0.737(1)  | 0.1780(9) | 1       | 0.64(6)              |
| O5        | 4a   | 0.1475(7) | 0.880(1)  | 0.500(1)  | 1       | 0.64(6)              |
| O6        | 4a   | 0.1231(7) | 0.169(1)  | 0.008(1)  | 1       | 0.64(6)              |
| O7        | 4a   | 0.9738(7) | 0.263(1)  | 0.4903(7) | 1       | 0.64(6)              |
| $x = 0.2$ | Site | $x$       | $y$       | $z$       | Occ.    | $B_{\text{eq.}}$ (Å) |
| Sr1/Ca1   | 4a   | 0.6732(2) | 0.0164(3) | 0.8691(1) | 0.8/0.2 | 0.27(7)              |
| Sr2       | 4a   | 0.6660(2) | 0.0088(3) | 0.5       | 1       | 0.87(7)              |
| Ga1(T1)   | 4a   | 0.0025(5) | 0.0115(4) | 0.9386(5) | 1       | 1.02(4)              |
| Zn1(T2)   | 4a   | 0.1755(2) | 0.9890(4) | 0.6805(5) | 1       | 0.58(5)              |

|    |    |           |           |           |   |         |
|----|----|-----------|-----------|-----------|---|---------|
| T3 | 4a | 0.0885(2) | 0.2461(3) | 0.1915(4) | 1 | 0.30(6) |
| T4 | 4a | 0.9242(2) | 0.2675(4) | 0.6662(4) | 1 | 0.79(7) |
| O1 | 4a | 0.002(1)  | 0.973(2)  | 0.2503(7) | 1 | 0.51(9) |
| O2 | 4a | 0.4870(8) | 0.012(2)  | 0.2195(9) | 1 | 0.51(9) |
| O3 | 4a | 0.2701(9) | 0.808(2)  | 0.7971(8) | 1 | 0.51(9) |
| O4 | 4a | 0.7466(9) | 0.747(1)  | 0.174(1)  | 1 | 0.51(9) |
| O5 | 4a | 0.1436(8) | 0.882(1)  | 0.495(1)  | 1 | 0.51(9) |
| O6 | 4a | 0.1224(8) | 0.179(1)  | 0.010(1)  | 1 | 0.51(9) |
| O7 | 4a | 0.9732(8) | 0.268(1)  | 0.491(1)  | 1 | 0.51(9) |

---

| $x = 0.4$ | Site | $x$       | $y$       | $z$       | Occ.    | $B_{\text{eq.}} (\text{Å})$ |
|-----------|------|-----------|-----------|-----------|---------|-----------------------------|
| Sr1/Ca1   | 4a   | 0.6732(2) | 0.0164(3) | 0.8691(1) | 0.6/0.4 | 0.27(7)                     |
| Sr2       | 4a   | 0.6660(2) | 0.0088(3) | 0.5       | 1       | 0.87(7)                     |
| Ga1(T1)   | 4a   | 0.0025(5) | 0.0115(4) | 0.9386(5) | 1       | 1.02(4)                     |
| Zn1(T2)   | 4a   | 0.1755(2) | 0.9890(4) | 0.6805(5) | 1       | 0.58(5)                     |
| T3        | 4a   | 0.0885(2) | 0.2461(3) | 0.1915(4) | 1       | 0.30(6)                     |
| T4        | 4a   | 0.9242(2) | 0.2675(4) | 0.6662(4) | 1       | 0.79(7)                     |
| O1        | 4a   | 0.002(1)  | 0.973(2)  | 0.2503(7) | 1       | 0.51(9)                     |
| O2        | 4a   | 0.4870(8) | 0.012(2)  | 0.2195(9) | 1       | 0.51(9)                     |
| O3        | 4a   | 0.2701(9) | 0.808(2)  | 0.7971(8) | 1       | 0.51(9)                     |
| O4        | 4a   | 0.7466(9) | 0.747(1)  | 0.174(1)  | 1       | 0.51(9)                     |
| O5        | 4a   | 0.1436(8) | 0.882(1)  | 0.495(1)  | 1       | 0.51(9)                     |
| O6        | 4a   | 0.1224(8) | 0.179(1)  | 0.010(1)  | 1       | 0.51(9)                     |

|                |      |           |           |           |         |                             |
|----------------|------|-----------|-----------|-----------|---------|-----------------------------|
| O7             | 4a   | 0.9732(8) | 0.268(1)  | 0.491(1)  | 1       | 0.51(9)                     |
| <i>x</i> = 0.6 | Site | <i>x</i>  | <i>y</i>  | <i>z</i>  | Occ.    | <i>B</i> <sub>eq.</sub> (Å) |
| Sr1/Ca1        | 4a   | 0.6728(3) | 0.0160(5) | 0.8700(2) | 0.4/0.6 | 0.22(8)                     |
| Sr2            | 4a   | 0.6663(3) | 0.0065(3) | 0.9377(5) | 1       | 1.29(7)                     |
| Ga1(T1)        | 4a   | 0.0014(5) | 0.0104(4) | 0.9377(5) | 1       | 0.67(4)                     |
| Zn1(T2)        | 4a   | 0.1747(2) | 0.9910(5) | 0.6809(5) | 1       | 0.60(5)                     |
| T3             | 4a   | 0.0897(2) | 0.2461(4) | 0.1899(4) | 1       | 0.22(7)                     |
| T4             | 4a   | 0.9239(2) | 0.2673(3) | 0.6674(4) | 1       | 0.78(8)                     |
| O1             | 4a   | 0.006(1)  | 0.974(2)  | 0.2500(7) | 1       | 0.22(9)                     |
| O2             | 4a   | 0.4849(8) | 0.025(2)  | 0.2225(9) | 1       | 0.22(9)                     |
| O3             | 4a   | 0.2667(9) | 0.805(1)  | 0.7949(8) | 1       | 0.22(9)                     |
| O4             | 4a   | 0.7463(9) | 0.749(2)  | 0.176(1)  | 1       | 0.22(9)                     |
| O5             | 4a   | 0.1467(9) | 0.887(1)  | 0.490(1)  | 1       | 0.22(9)                     |
| O6             | 4a   | 0.1187(8) | 0.189(1)  | 0.008(1)  | 1       | 0.22(9)                     |
| O7             | 4a   | 0.9694(9) | 0.271(1)  | 0.489(1)  | 1       | 0.22(9)                     |
| <i>x</i> = 0.8 | Site | <i>x</i>  | <i>y</i>  | <i>z</i>  | Occ.    | <i>B</i> <sub>eq.</sub> (Å) |
| Sr1/Ca1        | 4a   | 0.6728(3) | 0.0160(5) | 0.8697(2) | 0.2/0.8 | 0.22(8)                     |
| Sr2            | 4a   | 0.6663(3) | 0.0065(3) | 0.5       | 1       | 1.29(7)                     |
| Ga1(T1)        | 4a   | 0.0014(5) | 0.0104(4) | 0.9377(5) | 1       | 0.67(4)                     |
| Zn1(T2)        | 4a   | 0.1747(2) | 0.9910(5) | 0.6809(5) | 1       | 0.60(5)                     |
| T3             | 4a   | 0.0897(2) | 0.2461(4) | 0.1899(4) | 1       | 0.22(7)                     |
| T4             | 4a   | 0.9239(2) | 0.2673(4) | 0.6674(4) | 1       | 0.78(8)                     |



|              |      |           |           |           |      |                             |
|--------------|------|-----------|-----------|-----------|------|-----------------------------|
| O1           | 4a   | 0.006(1)  | 0.974(2)  | 0.2500(7) | 1    | 0.22(9)                     |
| O2           | 4a   | 0.4849(8) | 0.025(1)  | 0.2225(9) | 1    | 0.22(9)                     |
| O3           | 4a   | 0.2667(9) | 0.805(1)  | 0.7949(8) | 1    | 0.22(9)                     |
| O4           | 4a   | 0.7462(9) | 0.749(2)  | 0.176(1)  | 1    | 0.22(9)                     |
| O5           | 4a   | 0.1467(9) | 0.887(1)  | 0.490(1)  | 1    | 0.22(9)                     |
| O6           | 4a   | 0.1187(8) | 0.189(1)  | 0.008(1)  | 1    | 0.22(9)                     |
| O7           | 4a   | 0.9694(9) | 0.270(1)  | 0.489(1)  | 1    | 0.22(9)                     |
| <hr/>        |      |           |           |           |      |                             |
| <i>x</i> = 1 | Site | <i>x</i>  | <i>y</i>  | <i>z</i>  | Occ. | <i>B</i> <sub>eq.</sub> (Å) |
| <hr/>        |      |           |           |           |      |                             |
| Ca1          | 4a   | 0.6711(4) | 0.0130(6) | 0.8694(4) | 1    | 0.20(8)                     |
| Sr2          | 4a   | 0.6668(2) | 0.0039(3) | 0.5       | 1    | 1.14(5)                     |
| Ga1(T1)      | 4a   | 0.0006(4) | 0.0086(4) | 0.9383(4) | 1    | 0.44(1)                     |
| Zn1(T2)      | 4a   | 0.1755(2) | 0.9890(4) | 0.6823(4) | 1    | 0.44(1)                     |
| T3           | 4a   | 0.0900(2) | 0.2508(3) | 1915(4)   | 1    | 0.44(1)                     |
| T4           | 4a   | 0.9219(2) | 0.2633(3) | 6705(4)   | 1    | 0.44(1)                     |
| O1           | 4a   | 0.001(1)  | 0.982(2)  | 0.251(1)  | 1    | 0.19(8)                     |
| O2           | 4a   | 0.4869(8) | 0.008(2)  | 0.2273(9) | 1    | 0.19(8)                     |
| O3           | 4a   | 0.2609(8) | 0.785(1)  | 0.7984(9) | 1    | 0.19(8)                     |
| O4           | 4a   | 0.7471(9) | 0.727(1)  | 0.190(1)  | 1    | 0.19(8)                     |
| O5           | 4a   | 0.1513(8) | 0.901(1)  | 0.499(1)  | 1    | 0.19(8)                     |
| O6           | 4a   | 0.1204(7) | 0.196(1)  | 0.004(1)  | 1    | 0.19(8)                     |
| O7           | 4a   | 0.9658(8) | 0.276(1)  | 0.488(1)  | 1    | 0.19(8)                     |
| <hr/>        |      |           |           |           |      |                             |

Table S4. Selected interatomic distances (Å) in LT (Sr<sub>1-x</sub>Ca<sub>x</sub>)SrZn<sub>2</sub>Ga<sub>2</sub>O<sub>7</sub> ( $x = 0, 0.2, 0.4, 0.6, 0.8,$  and 1.0) obtained from Rietveld refinements against high-quality PXRD data.

| $x = 0$   |          |        |          |       |           |
|-----------|----------|--------|----------|-------|-----------|
| Sr1-O3    | 2.316(9) | Sr2-O5 | 2.472(7) | T1-O6 | 1.819(8)  |
| Sr1-O2    | 2.394(8) | Sr2-O4 | 2.540(8) | T1-O7 | 1.866(7)  |
| Sr1-O5    | 2.515(8) | Sr2-O3 | 2.562(7) | T1-O5 | 1.899(8)  |
| Sr1-O7    | 2.543(7) | Sr2-O7 | 2.597(7) | T1-O1 | 1.918(7)  |
| Sr1-O6    | 2.600(8) | Sr2-O6 | 2.601(7) | T2-O3 | 1.929(9)  |
| Sr1-O4    | 2.626(8) | Sr2-O2 | 2.782(8) | T2-O5 | 1.96(1)   |
| T3-O2     | 1.881(9) | T4-O7  | 1.840(8) | T2-O4 | 2.026(8)  |
| T3-O3     | 1.911(8) | T4-O4  | 1.865(8) | T2-O1 | 2.06(1)   |
| T3-O6     | 1.95(1)  | T4-O2  | 1.918(9) |       |           |
| T3-O1     | 2.089(9) | T4-O1  | 1.965(9) |       |           |
| $x = 0.2$ |          |        |          |       |           |
| Sr1/Ca-O2 | 2.340(9) | Sr2-O3 | 2.463(9) | T1-O5 | 1.846(11) |
| Sr1/Ca-O3 | 2.44(1)  | Sr2-O5 | 2.499(8) | T1-O6 | 1.85(1)   |
| Sr1/Ca-O6 | 2.47(1)  | Sr2-O4 | 2.52(1)  | T1-O7 | 1.878(9)  |
| Sr1/Ca-O5 | 2.49(1)  | Sr2-O7 | 2.567(9) | T1-O1 | 1.906(9)  |
| Sr1/Ca-O7 | 2.57(1)  | Sr2-O6 | 2.637(9) | T2-O4 | 1.89(1)   |
| Sr1/Ca-O4 | 2.61(1)  | Sr2-O2 | 2.796(9) | T2-O3 | 1.95(1)   |
| T3-O6     | 1.92(1)  | T4-O7  | 1.86(1)  | T2-O5 | 2.03(1)   |
| T3-O2     | 1.93(1)  | T4-O4  | 1.90(1)  | T2-O1 | 2.11(1)   |
| T3-O3     | 1.94(1)  | T4-O2  | 1.92(1)  |       |           |
| T3-O1     | 2.07(1)  | T4-O1  | 1.93(1)  |       |           |
| $x = 0.4$ |          |        |          |       |           |
| Sr1/Ca-O2 | 2.319(9) | Sr2-O3 | 2.470(8) | T1-O5 | 1.84(1)   |
| Sr1/Ca-O3 | 2.418(9) | Sr2-O4 | 2.510(7) | T1-O6 | 1.86(1)   |
| Sr1/Ca-O6 | 2.427(9) | Sr2-O5 | 2.51(1)  | T1-O7 | 1.880(8)  |
| Sr1/Ca-O5 | 2.436(9) | Sr2-O7 | 2.584(9) | T1-O1 | 1.886(8)  |
| Sr1/Ca-O7 | 2.538(9) | Sr2-O6 | 2.641(8) | T2-O4 | 1.871(9)  |

|           |          |        |          |       |          |
|-----------|----------|--------|----------|-------|----------|
| Sr1/Ca-O4 | 2.61(1)  | Sr2-O2 | 2.804(9) | T2-O3 | 1.942(9) |
| T3-O6     | 1.92(1)  | T4-O7  | 1.86(1)  | T2-O5 | 2.03(1)  |
| T3-O2     | 1.94(1)  | T4-O4  | 1.90(1)  | T2-O1 | 2.11(1)  |
| T3-O3     | 1.950(9) | T4-O2  | 1.92(1)  |       |          |
| T3-O1     | 2.07(1)  | T4-O1  | 1.92(1)  |       |          |
| $x = 0.6$ |          |        |          |       |          |
| Sr1/Ca-O2 | 2.301(9) | Sr2-O5 | 2.492(7) | T1-O5 | 1.84(1)  |
| Sr1/Ca-O3 | 2.40(1)  | Sr2-O3 | 2.497(9) | T1-O6 | 1.86(1)  |
| Sr1/Ca-O6 | 2.40(1)  | Sr2-O4 | 2.54(1)  | T1-O7 | 1.875(9) |
| Sr1/Ca-O5 | 2.41(1)  | Sr2-O7 | 2.59(1)  | T1-O1 | 1.896(8) |
| Sr1/Ca-O7 | 2.51(1)  | Sr2-O6 | 2.68(1)  | T2-O4 | 1.86(1)  |
| Sr1/Ca-O4 | 2.60(1)  | Sr2-O2 | 2.801(9) | T2-O3 | 1.93(1)  |
| T3-O2     | 1.88(1)  | T4-O7  | 1.87(1)  | T2-O5 | 2.06(1)  |
| T3-O6     | 1.89(1)  | T4-O4  | 1.88(1)  | T2-O1 | 2.13(1)  |
| T3-O3     | 1.94(1)  | T4-O1  | 1.90(1)  |       |          |
| T3-O1     | 2.04(1)  | T4-O2  | 1.99(1)  |       |          |
| $x = 0.8$ |          |        |          |       |          |
| Sr1/Ca-O2 | 2.28(1)  | Sr2-O3 | 2.51(1)  | T1-O5 | 1.83(1)  |
| Sr1/Ca-O3 | 2.33(1)  | Sr2-O5 | 2.515(8) | T1-O6 | 1.87(1)  |
| Sr1/Ca-O6 | 2.34(1)  | Sr2-O4 | 2.54(1)  | T1-O7 | 1.89(1)  |
| Sr1/Ca-O5 | 2.38(1)  | Sr2-O7 | 2.57(1)  | T1-O1 | 1.904(9) |
| Sr1/Ca-O7 | 2.50(1)  | Sr2-O6 | 2.70(1)  | T2-O4 | 1.93(1)  |
| Sr1/Ca-O4 | 2.52(1)  | Sr2-O2 | 2.84(1)  | T2-O3 | 1.96(1)  |
| T3-O2     | 1.87(1)  | T4-O4  | 1.84(1)  | T2-O5 | 2.05(1)  |
| T3-O6     | 1.93(1)  | T4-O7  | 1.85(1)  | T2-O1 | 2.11(1)  |
| T3-O3     | 1.95(1)  | T4-O1  | 1.88(1)  |       |          |
| T3-O1     | 2.06(1)  | T4-O2  | 1.97(1)  |       |          |
| $x = 1$   |          |        |          |       |          |
| Ca-O3     | 2.23(1)  | Sr2-O3 | 2.544(9) | T1-O5 | 1.86(1)  |
| Ca-O2     | 2.25(1)  | Sr2-O5 | 2.544(7) | T1-O6 | 1.88(1)  |

|       |          |        |          |       |          |
|-------|----------|--------|----------|-------|----------|
| Ca-O6 | 2.34(1)  | Sr2-O4 | 2.55(1)  | T1-O1 | 1.88(1)  |
| Ca-O5 | 2.40(1)  | Sr2-O7 | 2.604(9) | T1-O7 | 1.887(8) |
| Ca-O4 | 2.42(1)  | Sr2-O6 | 2.648(8) | T2-O5 | 1.94(1)  |
| Ca-O7 | 2.43(1)  | Sr2-O2 | 2.838(9) | T2-O3 | 1.966(9) |
| T3-O2 | 1.92(1)  | T4-O4  | 1.88(1)  | T2-O4 | 1.97(1)  |
| T3-O6 | 1.95(1)  | T4-O7  | 1.89(1)  | T2-O1 | 2.07(1)  |
| T3-O3 | 1.968(9) | T4-O2  | 1.92(1)  |       |          |
| T3-O1 | 2.03(1)  | T4-O1  | 1.93(1)  |       |          |

Table S5. Selected interatomic distances (Å) in HT CaSrZn<sub>2</sub>Ga<sub>2</sub>O<sub>7</sub> obtained from Rietveld refinements against NPD data.

|         |         |             |         |             |         |
|---------|---------|-------------|---------|-------------|---------|
| Ca-O1   | 2.11(3) | Sr-O8       | 2.46(2) | Ga1-O7 × 3  | 1.88(1) |
| Ca-O9'  | 2.26(4) | Sr-O9       | 2.54(2) | Ga1-O4      | 1.89(2) |
| Ca-O3   | 2.32(2) | Sr-O1'      | 2.59(2) | Ga1-O7' × 3 | 1.90(9) |
| Ca-O7'  | 2.33(6) | Sr-O1       | 2.63(3) | Ga2-O8 × 3  | 1.81(2) |
| Ca-O2   | 2.33(3) | Sr-O2       | 2.68(2) | Ga2-O8' × 3 | 1.86(3) |
| Ca-O8'  | 2.34(4) | Sr-O8'      | 2.70(3) | Ga2-O5      | 1.87(1) |
| Ca-O1'  | 2.38(2) | Sr-O7       | 2.71(1) | Ga3-O9 × 3  | 1.79(2) |
| Ca-O9   | 2.42(2) | Sr-O3       | 2.71(1) | Ga3-O9' × 3 | 1.85(3) |
| Ca-O8   | 2.46(2) | Sr-O9'      | 2.71(3) | Ga6-O6      | 1.94(1) |
| Ca-O7   | 2.55(2) | Sr-O7'      | 2.80(8) |             |         |
| Zn1-O7  | 1.73(1) | Zn2/Ga4-O1' | 1.88(2) | Zn3/Ga5-O2  | 1.90(2) |
| Zn1-O7' | 1.92(2) | Zn2/Ga4-O3  | 1.88(2) | Zn3/Ga5-O1' | 1.92(3) |
| Zn1-O3  | 1.92(2) | Zn2/Ga4-O6  | 1.95(1) | Zn3/Ga5-O9' | 1.98(4) |
| Zn1-O2  | 1.92(2) | Zn2/Ga4-O8' | 1.98(3) | Zn3/Ga5-O5  | 1.99(1) |
| Zn1-O4  | 2.06(1) | Zn2/Ga4-O8  | 2.02(2) | Zn3/Ga5-O9  | 2.05(2) |
|         |         | Zn2/Ga4-O1  | 2.00(3) | Zn3/Ga5-O1  | 2.02(4) |

### Definition of the tolerance factor in $(\text{Sr}_{1-x}\text{Ca}_x)\text{SrZn}_2\text{Ga}_2\text{O}_7$ .

As described in the main text, the structure of  $(\text{Sr}_{1-x}\text{Ca}_x)\text{SrZn}_2\text{Ga}_2\text{O}_7$  is isostructural to the archetype structure of  $P6_3mc\text{-YBaCo}_4\text{O}_7$ , which is built by alternatively mixed hexagonal closed packing  $\text{BaO}_3$ -layers [ $\text{AO}_3$ ] and cubic closed packing  $\text{O}_4$ -layers. The octahedral ( $M$ ) and tetrahedral ( $T$ ) cavities are partially occupied by  $\text{Y}^{3+}$  and  $\text{Co}^{2+/3+}$  ions. As shown in Fig. S11, the framework structure of  $\text{MAT}_4\text{O}_7$  is composed of  $\text{MO}_6$ ,  $\text{AO}_{12}$ , and  $\text{TO}_4$  polyhedra. Assuming that all these polyhedra are undistorted, hence the cell dimensions ( $a$  and  $c$ ) and the  $M$ -O ( $d_{M-O}$ ) and  $A$ -O ( $d_{A-O}$ ) bond distances can be expressed in terms of the  $T$ -O ( $d_{T-O}$ ), as given below:

$$a_{ideal} = \frac{4\sqrt{6}}{3}d_{T-O} \quad (1)$$

$$c_{ideal} = \frac{16}{3}d_{T-O} \quad (2)$$

$$d_{M-O} = \frac{2}{\sqrt{3}}d_{T-O} \quad (3)$$

$$d_{A-O} = \frac{4}{\sqrt{6}}d_{T-O} \quad (4)$$

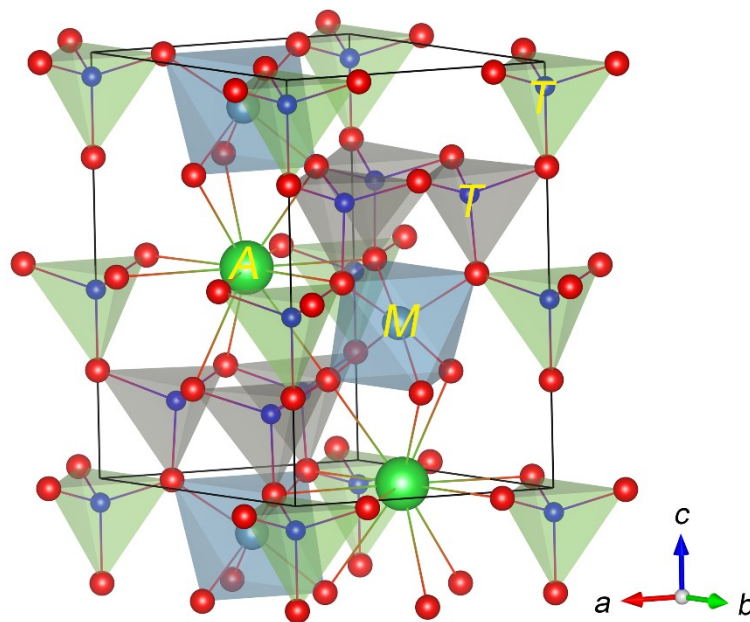

Fig. S11 Structural view of the  $P6_3mc$ -model for  $\text{MAT}_4\text{O}_7$  oxides.

According to equations 3 and 4, we can further obtain the following equations

$$\frac{d_{A-O}}{d_{M-O}} = \frac{2}{\sqrt{2}} = \sqrt{2} \quad (5)$$

$$\frac{R_A + R_O}{R_M + R_O} = \sqrt{2} \quad (6)$$

where  $R_A$ ,  $R_M$  and  $R_O$  represent the radii of  $A$ ,  $M$ , and  $O$  ions. Equations 5 and 6 share the same expression as the tolerance factor ( $\tau$ ) that defined by the radii of  $A$ ,  $B$ , and  $O$  ions in  $ABO_3$  perovskite. Furthermore, amongst the  $Sr_{1-x}Ca_xSrZn_2Ga_2O_7$  series, the  $T$ -site  $Zn^{2+}$  and  $Ga^{3+}$  cations remained unchanged and we just adjusted the  $M$ -site cation size. Therefore, the structural flexibility or stability for the compounds with the general formula  $MAZn_2Ga_2O_7$  can be assessed by the tolerance factor  $\tau = (R_A + R_O)/\sqrt{2}(R_M + R_O)$ .
